# Supplementary material for: Movement of Chronic Wasting Disease Prions in Prairie, Boreal and Alpine Soils
Source: MDPI journal article supplement (doi:10.3390/pathogens12020269), 2023-02-07
Supplement: s1 [file s1]

# Movement of chronic wasting disease prions in prairie, boreal and alpine soils

Alsu Kuznetsova<sup>1,2</sup>, Debbie McKenzie<sup>2,3</sup>, Bjørnar Ytrehus<sup>5,6</sup>, Kjersti Selstad Utaaker<sup>5,7</sup> and Judd M. Aiken<sup>2,4\*</sup>

<sup>1</sup> Department of Renewable Resources, University of Alberta, Edmonton, AB T6G 2G8, Canada

<sup>2</sup> Centre for Prions and Protein Folding Diseases, University of Alberta, Edmonton, AB T6G 2M8, Canada

<sup>3</sup> Department of Biological Sciences, University of Alberta, Edmonton, Alberta, Canada

<sup>4</sup> Department of Agricultural, Food and Nutritional Sciences, University of Alberta, Edmonton, Alberta, Canada

<sup>5</sup> Norwegian Institute for Nature Research (NINA), Trondheim, Norway

<sup>6</sup> Department of Biomedicine and Veterinary Public Health Sciences, Swedish University of Agricultural Sciences, Uppsala, Sweden

<sup>7</sup> Faculty of Biosciences and Aquaculture, Nord University, Bodø, Norway

\* Correspondence: to: Judd Aiken, e-mail: [judd.aiken@ualberta.ca](mailto:judd.aiken@ualberta.ca)

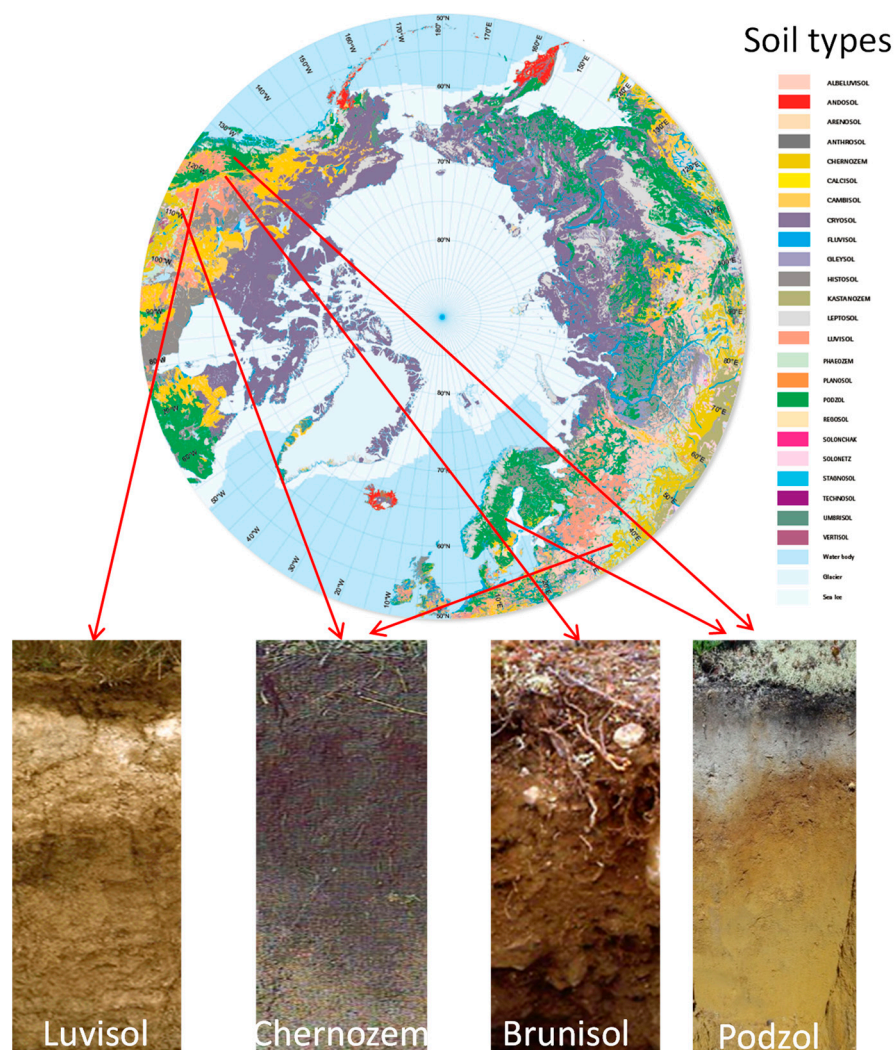

**Figure S1.** Soil map of circumpolar area with CWD-endemic region (Map source: [https://esdac.jrc.ec.europa.eu/Library/Maps/Circumpolar/Documents/Circumpolar\\_atlas.pdf](https://esdac.jrc.ec.europa.eu/Library/Maps/Circumpolar/Documents/Circumpolar_atlas.pdf)).

## Experiment 1

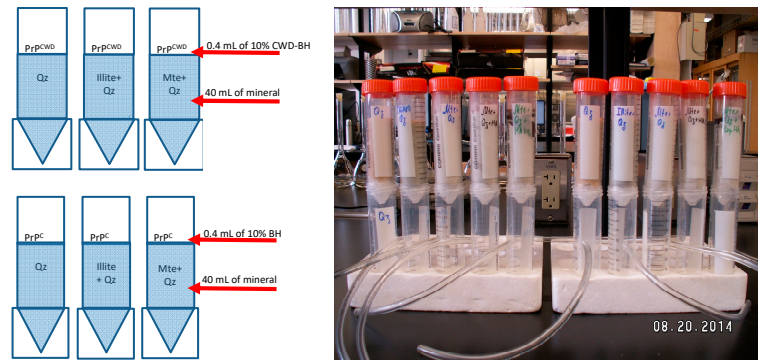

## Experiment 2

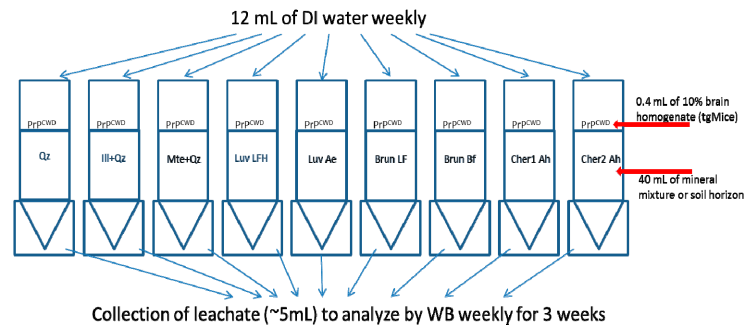

**Figure S2.** Experimental design of the PrPC<sup>WD</sup> Transport Experiments. 24x100 mm tubes with perforated bottom were filled with 40 mL of minerals (quartz, Qz; illite, Ill; montmorillonite, Mte) or soil horizons (Luv – northern Luvisol, LFH and Ae horizons; Brun – mountain Brunisol, LFH and Bf horizons; Cher1 and Cher2 – central and southern Chernozems, Ah horizons). Ratios used - Mte:Qz 30:70 = sandy clay loam texture for columns incubated 6 weeks; Mte:Qz 50:50 = sandy loam texture for a column incubated 3 weeks. Brain homogenate (BH, 1% , tgMice ) was applied on the surface. Columns were irrigated weekly with water, 12mL (simulating 90mm/month precipitation). Leachate was collected weekly to analyze presence of PrP.

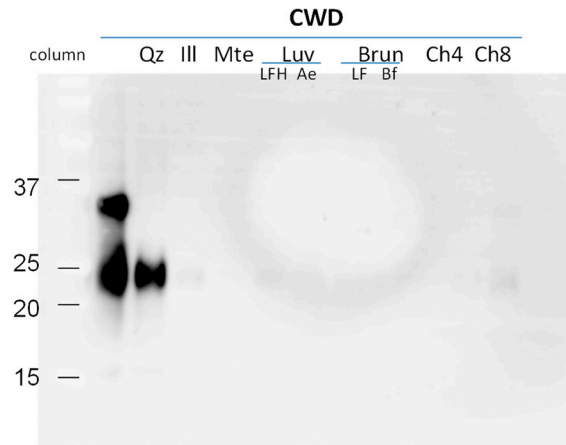

**Figure S3.** Leachate obtained at the third week from all 9 columns (column experiment 2): Qz – quartz, Ill – illite(50%)+quartz, Mte – montmorillonite (50%)+quartz, Luv – northern Luvisol, horizons LFH and Ae, Brun – mountain Brunisol, horizons LFH and Bf, Ch – Chernozems. ~ 5 mL of leachate was obtained from each column; 50uL of leachate were boiled at 100°C with SB and analyzed by western blot using mab Bar224.

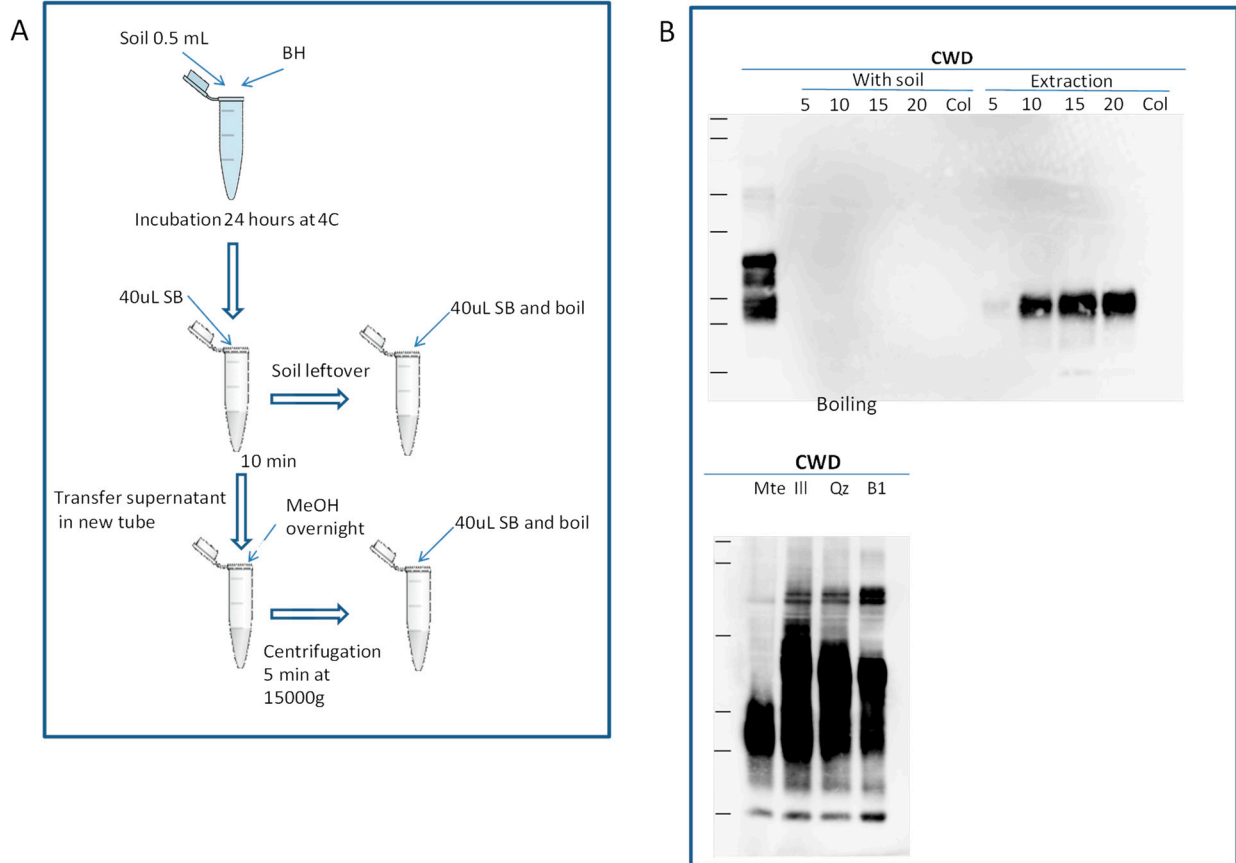

**Figure S4.** PrP extraction from solid phase. (A) Extraction protocol from soil. (B) Extraction 5 uL CWD from 0.5 mL of solid soil analyzed by western blot using Bar224 antibody.

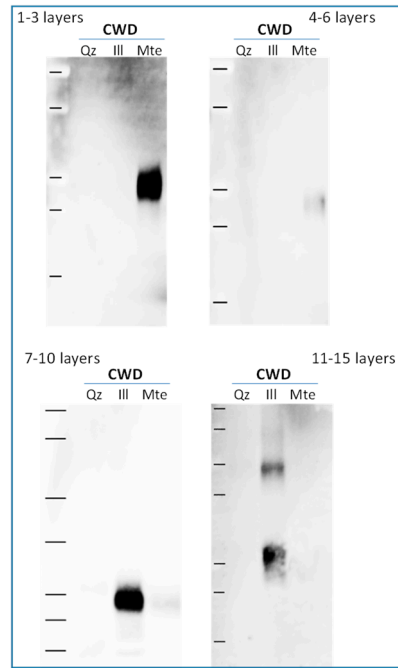

**Figure S5.** PrP signal extracted from solid phase of columns after 3 weeks incubation, mixed layers. Samples were boiled at 100°C with SDS and analyzed by western blot using Bar224 antibody.
